# Supplementary material for: Mechanical Properties and Microscopic Geological Features under Uniaxial Compression in Tight Reservoir
Source: Hindawi journal article supplement (doi:10.1155/2021/6687478), 2021-01-28
Supplement: f1 [file 6687478.f1.docx]

**Table S1.** Mechanical properties parameters of the samples. 1#-4#, Upper Triassic sandstones, 5#-8#, Upper Triassic sandstones.

| Sample | Temperature, ℃ | Confining pressure, MPa | Rock fracture time, s | Maximum stress, MPa | Reflection stress, MPa | Young’s modulus, GPa | Poisson’s ratio |
| --- | --- | --- | --- | --- | --- | --- | --- |
| 1# | 85.8 | 34.2 | 584.4 | 136.6 | 80.81 | 18.2 | 0.29 |
| 2# | 87.3 | 35.1 | 1330.2 | 299.2 | 267.79 | 14.8 | 0.18 |
| 3# | 106.1 | 48.1 | 999.0 | 59.9 | 53.24 | 14.5 | 0.12 |
| 4# | 98.1 | 37.2 | 1104.8 | 71.0 | 21.57 | 13.8 | 0.29 |
| 5# | 106.3 | 48.2 | 756.8 | 85.6 | 48.2 | 18.3 | 0.25 |
| 6# | 98.9 | 37.2 | 936.5 | 89.4 | / | 21.0 | 0.12 |
| 7# | 101.5 | 37.1 | 711.8 | 54.8 | 54.82 | 15.7 | 0.21 |
| 8# | 101.6 | 39.1 | 965.4 | 91.3 | 38.52 | 15.7 | 0.21 |

**Table S2.** Petrophysical properties and mercury intrusion parameters of the samples. 1#-4#, Upper Triassic sandstones, 5#-8#, Upper Triassic sandstones.

| Sample | φ, % | K, mD | Q, % | PF, % | Pc, % | Ca, % | Do, % | Ank, % | Cl, % |
| --- | --- | --- | --- | --- | --- | --- | --- | --- | --- |
| 1# | 1.14 | 0.01 | 34.2 | 1.4 | 10.8 | 0.9 | 21.2 | 22 | 9.5 |
| 2# | 6.77 | 2.31 | 52.8 | 8.2 | 19.7 | 0.0 | 6.5 | 6.4 | 6.4 |
| 3# | 5.57 | 0.14 | 32.3 | 11.1 | 32 | 0.5 | 6.6 | 4.3 | 13.1 |
| 4# | 5.7 | 0.45 | 12.9 | 6.2 | 41.5 | 13.3 | 1.3 | 0.0 | 24.8 |
| 5# | 5.35 | 0.36 | 86.7 | 0.0 | 0.0 | 0.0 | 0.0 | 0.0 | 13.3 |
| 6# | 0.82 | 0.01 | 89.7 | 0.0 | 0.0 | 0.0 | 0.0 | 0.0 | 10.3 |
| 7# | 1.06 | 0.01 | 74.3 | 0.0 | 0.0 | 2.9 | 0.0 | 0.0 | 22.7 |
| 8# | 7.07 | 0.35 | 90.7 | 0.0 | 0.0 | 0.6 | 0.0 | 0.0 | 8.6 |

**Table S3.** Elements compositions of the samples. 1#-4#, Upper Triassic sandstones, 5#-8#, Upper Triassic sandstones.

| Sample | Na, % | Mg, % | Al, % | Si, % | P, % | S, % | K, % | Ca, % | Ti, % | Mn, % | Fe, % |
| --- | --- | --- | --- | --- | --- | --- | --- | --- | --- | --- | --- |
| 1# | 1.03 | 3.68 | 5.84 | 24.56 | 0.16 | 0.05 | 1.37 | 11.81 | 0.23 | 0.11 | 5.58 |
| 2# | 0.79 | 2.19 | 8.05 | 31.59 | 0.10 | 0.04 | 1.66 | 2.67 | 0.25 | 0.05 | 3.12 |
| 3# | 0.94 | 3.19 | 6.55 | 26.96 | 0.16 | 0.05 | 1.36 | 9.35 | 0.22 | 0.08 | 4.24 |
| 4# | 0.88 | 2.45 | 9.56 | 28.10 | 0.18 | 0.04 | 1.58 | 5.91 | 0.23 | 0.08 | 2.66 |
| 5# | 0.71 | 1.72 | 6.85 | 36.73 | 0.09 | 0.04 | 0.69 | 0.06 | 0.14 | 0.01 | 1.39 |
| 6# | 0.71 | 1.78 | 9.04 | 33.72 | 0.06 | 0.04 | 1.03 | 0.16 | 0.08 | 0.04 | 2.60 |
| 7# | 0.67 | 1.59 | 5.70 | 35.99 | 0.08 | 0.04 | 0.47 | 0.46 | 0.11 | 0.03 | 4.09 |
| 8# | 0.68 | 1.68 | 8.12 | 35.07 | 0.04 | 0.03 | 1.12 | 0.31 | 0.10 | 0.03 | 1.74 |

**Fig. S1.** Dynamic stress and strain history. (a) 1#, (b) 3#, (c) 4#, (d) 6#, (e) 7#, (f) 8#. T-temperature, CP-confining pressure.

**Fig. S2.** Stress and strain history. (a) 1#, (b) 3#, (c) 4#, (d) 6#, (e) 7#, (f) 8#.

**Fig. S3.** Relationships between elements (amount below 1 %) and mechanical properties. (a) sodium, (b) titanium, (c) phosphorus, (d) manganese, (e) sulfur. RFT-rock fracture time, MS-maximum stress, RS-reflection stress, YM-Young’s modulus, PR-Poisson’s ratio, Black point-Upper Triassic, red point -Lower Permian.
